# Supplementary material for: Galectin-3 as a potential prognostic biomarker of severe COVID-19 in SARS-CoV-2 infected patients
Source: bioRxiv or medRxiv preprint supplement (doi:10.1101/2021.02.07.21251281), 2021-02-09
Supplement: Supplementary file [file media-1.pdf]

**Supplementary Table 1. Demographic characteristics, healthy subjects.**

|                       | <b>Total<br/>(n= 10)</b> |
|-----------------------|--------------------------|
| Age                   | 48.70 ± 5.48             |
| Gender, female        | 6 (60.0%)                |
| Weight                | 59.12 ± 6.34             |
| BMI                   | 22.81 ± 1.35             |
| Hypertension          | 0 (0.0%)                 |
| Diabetes              | 0 (0.0%)                 |
| Alcohol consumption   | 2 (20.0%)                |
| Galectin-3 (ng/mL)    | 9.65 [8.27 – 14.71]      |
| Glucose (mg/dL)       | 89.8 ± 6.07              |
| Triglycerides (mg/dL) | 111.70 ± 46.31           |
| Creatinine (mg/dL)    | 0.78 ± 0.14              |
| ALT (U/L)             | 24.0 ± 8.47              |
| AST (U/L)             | 25.6 ± 4.40              |

Data are reported as mean ( $\pm$  SD), median (IQR) and *n* (%). BMI= Body mass index, ALT= alanine transaminase, AST= aspartate transaminase.

**Supplementary Table 2. Forward-stepwise multivariable logistic regression**

|               | <b>Variables</b>    | <b><i>p</i> value</b> |
|---------------|---------------------|-----------------------|
| <b>Step 0</b> | Age                 | 0.260                 |
|               | Gender, male        | 0.491                 |
|               | Diabetes            | 0.244                 |
|               | Hypertension        | 0.317                 |
|               | Galectin-3 (binary) | < 0.0001              |
|               | INR                 | 0.047                 |
|               | Albumin             | < 0.0001              |
|               | Triglycerides       | < 0.01                |
|               | Ferritin            | 0.01                  |
|               | D-Dimer             | < 0.01                |
|               | CRP                 | < 0.0001              |
|               | Lymphocyte count    | 0.334                 |
|               | Neutrophil count    | <0.001                |
|               | NLR                 | <0.01                 |

|               | <b>Variables</b>    | <b>OR (95% CI)</b>  | <b><i>p</i> value</b> |
|---------------|---------------------|---------------------|-----------------------|
| <b>Step 1</b> | Galectin-3 (binary) | 6.65 (2.82 – 15.70) | < 0.0001              |
| <b>Step 2</b> | Galectin-3 (binary) | 5.00 (2.00 – 12.45) | < 0.001               |
|               | Albumin             | 0.19 (0.07 – 0.51)  | < 0.01                |
| <b>Step 3</b> | Galectin-3 (binary) | 3.89 (1.50 – 10.10) | < 0.01                |

|  |         |                    |        |
|--|---------|--------------------|--------|
|  | CRP     | 1.05 (1.00 – 1.11) | 0.04   |
|  | Albumin | 0.24 (0.09 – 0.65) | < 0.01 |

Variables included in every step of the forward-stepwise logistic regression. INR= International normalized ratio, CRP= C-reactive protein, NLR= Neutrophil to lymphocyte ratio.
